# Supplementary material
Source: PubMed Central journal article supplement (PMC4498569)

| Tissue  | Female+/+ 6326<br>Water                                                            | Female+/+ 6395<br>CDME                                                              |
|---------|------------------------------------------------------------------------------------|-------------------------------------------------------------------------------------|
| Kidney  | 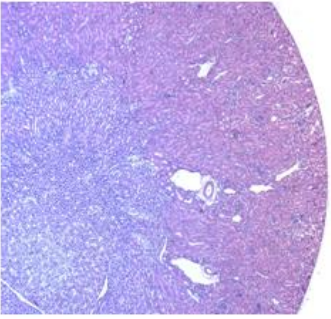  |   |
| Bladder |   |   |
| Liver   |  |  |

Supplement: NIHMS700407-supplement-1.pdf [file NIHMS700407-supplement-1.pdf]

| Tissue  | Male+/+ 6331<br>Water                                                              | Male+/+ 6400<br>CDME                                                                 |
|---------|------------------------------------------------------------------------------------|--------------------------------------------------------------------------------------|
| Kidney  | 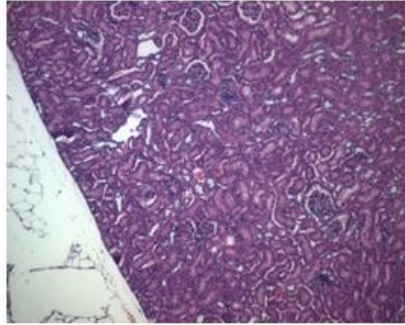  |   |
| Bladder |   |   |
| Liver   |  |  |

Supplement: NIHMS700407-supplement-2.pdf [file NIHMS700407-supplement-2.pdf]
